# Supplementary material for: A mechanism for the sharp transition of morphogen gradient interpretation in Xenopus
Source: PubMed Central journal article supplement (PMC1885807; doi:10.1186/1471-213x-7-47), 2007-05-16
Supplement: 1471-213X-7-47-S1.pdf [file 1471-213X-7-47-S1.pdf]

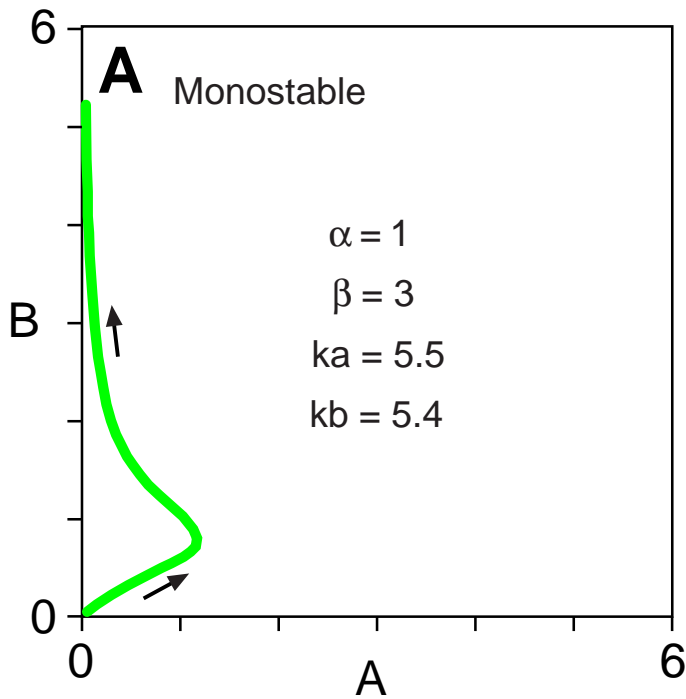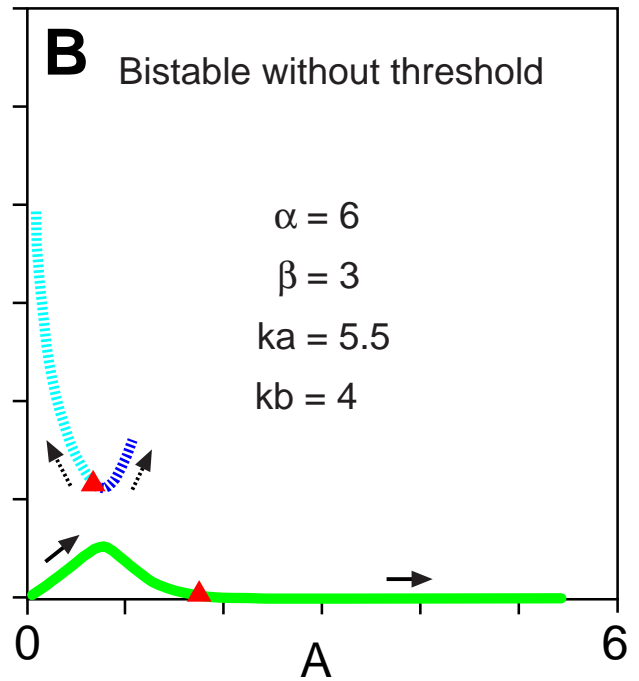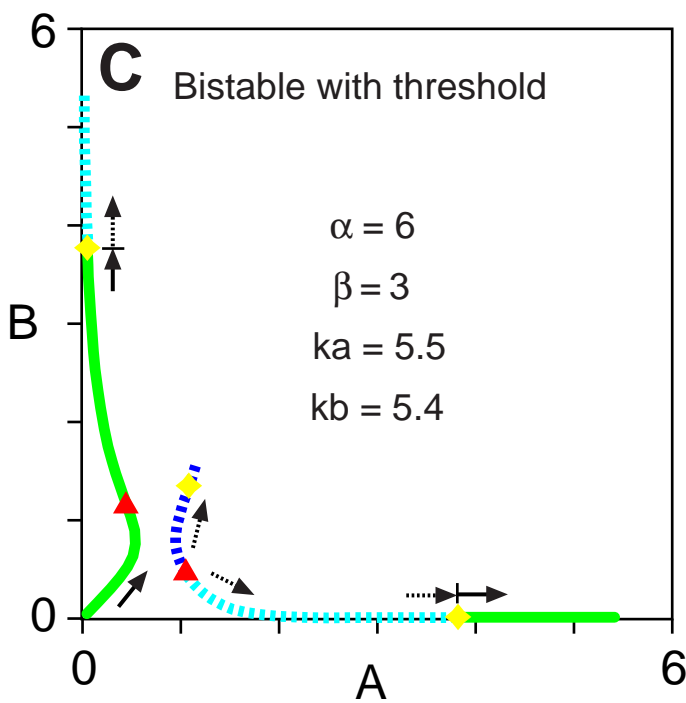

$M = 0 \rightarrow \infty$   
 $t = \infty$

- ▲ At bifurcation
- ◆ At threshold
- Node at steady state
- ⋯ Other node
- ⋯ Saddle
