# Supplementary material for: A mechanism for the sharp transition of morphogen gradient interpretation in Xenopus
Source: PubMed Central journal article supplement (PMC1885807; doi:10.1186/1471-213x-7-47), 2007-05-16

**A**

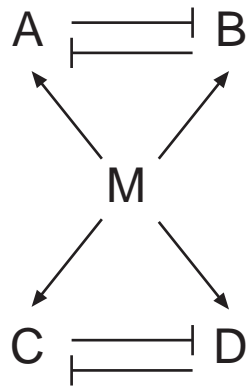

**B**

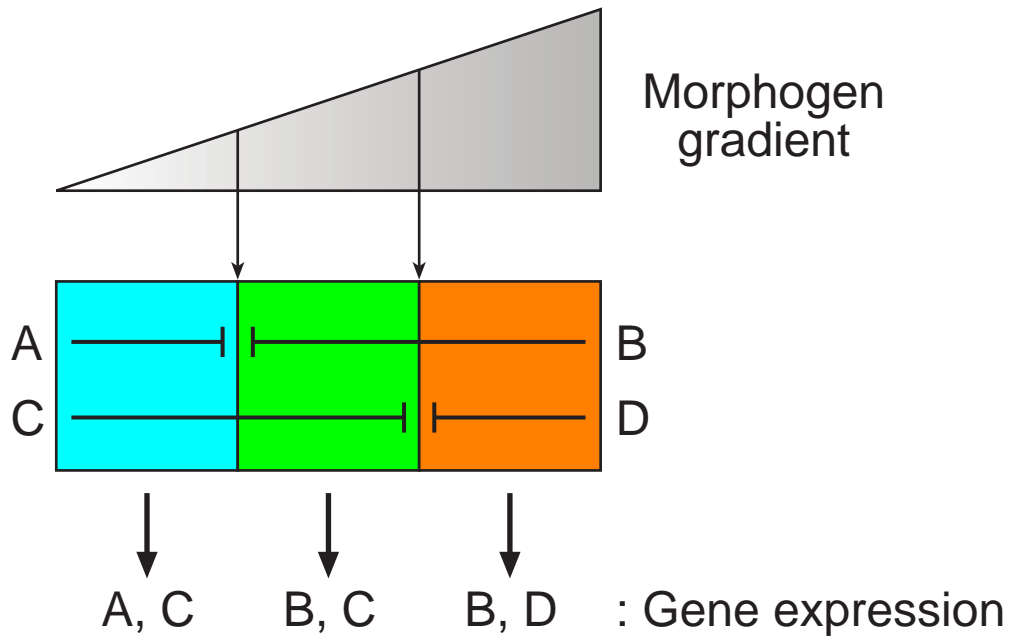

Supplement: 1471-213X-7-47-S2.pdf [file 1471-213X-7-47-S2.pdf]
